# Supplementary material for: Unravelling the effects of functional groups on the adsorption of 2-mercaptobenzothiazole on a copper surface: a DFT study
Source: Royal Society of Chemistry journal article supplement (doi:10.1039/d4cp00988f), 2024-01-01
Supplement: d4cp00988f1.pdf [file d4cp00988f1.pdf]

Electronic Supplementary Information

**Unravelling the Effects of Functional Groups on the Adsorption of  
2-Mercaptobenzothiazole on the Copper Surface: A DFT Study**

Thanh Hai Pham<sup>a,b,c,\*</sup>, Viorel Chihaia<sup>d</sup>, Do Ngoc Son<sup>a,b,\*</sup>

<sup>a</sup> *Ho Chi Minh City University of Technology (HCMUT), 268 Ly Thuong Kiet Street, District 10, Ho Chi Minh City, Viet Nam.*

<sup>b</sup> *Vietnam National University Ho Chi Minh City (VNU-HCM), Linh Trung Ward, Ho Chi Minh City, Viet Nam*

<sup>c</sup> *Vietnam Institute for Tropical Technology and Environmental Protection, 57A Truong Quoc Dung Street, Phu Nhuan District, Ho Chi Minh City, Vietnam*

<sup>d</sup> *Institute of Physical Chemistry "Ilie Murgulescu" of the Romanian Academy, Splaiul Independentei 202, Sector 6, 060021 Bucharest, Romania*

*\*Corresponding author. Email addresses: [pthai.sdh21@hcmut.edu.vn](mailto:pthai.sdh21@hcmut.edu.vn) (Thanh Hai Pham); [dson@hcmut.edu.vn](mailto:dson@hcmut.edu.vn) (Do Ngoc Son)*

**Table S1.** Effect of basis set selection on calculated quantum chemical parameters of MBT derivatives.

| Compound            | B3LYP/6-31+G(d,p)         |                           |                       |              | B3LYP/Def2-TZVP           |                           |                       |              |
|---------------------|---------------------------|---------------------------|-----------------------|--------------|---------------------------|---------------------------|-----------------------|--------------|
|                     | E <sub>HOMO</sub><br>(eV) | E <sub>LUMO</sub><br>(eV) | E <sub>gap</sub> (eV) | μ<br>(Debye) | E <sub>HOMO</sub><br>(eV) | E <sub>LUMO</sub><br>(eV) | E <sub>gap</sub> (eV) | μ<br>(Debye) |
| MBT-H               | -5.963                    | -1.524                    | 4.439                 | 5.115        | -5.906                    | -1.431                    | 4.475                 | 4.804        |
| MBT-CH <sub>3</sub> | -5.848                    | -1.432                    | 4.416                 | 5.672        | -5.795                    | -1.347                    | 4.448                 | 5.316        |
| MBT-OH              | -5.804                    | -1.436                    | 4.368                 | 6.204        | -5.730                    | -1.343                    | 4.387                 | 5.953        |
| MBT-COOH            | -6.258                    | -2.204                    | 4.055                 | 2.380        | -6.192                    | -2.085                    | 4.107                 | 2.194        |
| MBT-NO <sub>2</sub> | -6.581                    | -3.118                    | 3.463                 | 3.319        | -6.504                    | -2.927                    | 3.577                 | 3.175        |

**Table S2.** HOMO and LUMO distributions of MBT derivatives.

| Compound              | HOMO distribution (%) |                |      |       | LUMO distribution (%) |                |      |       |
|-----------------------|-----------------------|----------------|------|-------|-----------------------|----------------|------|-------|
|                       | S1                    | S <sub>m</sub> | N3   | R     | S1                    | S <sub>m</sub> | N    | R     |
| MBT-H                 | 13.35                 | <b>44.85</b>   | 7.90 | 0.54  | 9.15                  | <b>24.04</b>   | 6.16 | 0.92  |
| MBT-CH <sub>3</sub>   | 11.81                 | <b>43.30</b>   | 8.21 | 1.92  | 8.76                  | <b>23.73</b>   | 6.35 | 2.10  |
| MBT-OH                | 8.36                  | <b>39.68</b>   | 9.05 | 4.97  | 6.48                  | <b>21.32</b>   | 6.06 | 1.29  |
| MBT-SH                | 7.10                  | <b>34.40</b>   | 8.22 | 14.07 | 7.39                  | <b>22.31</b>   | 5.61 | 2.65  |
| MBT-NH <sub>2</sub>   | 5.45                  | <b>32.44</b>   | 8.59 | 11.67 | 7.03                  | <b>21.82</b>   | 6.63 | 2.07  |
| MBT-OCH <sub>3</sub>  | 8.52                  | <b>38.17</b>   | 8.54 | 6.60  | 8.07                  | <b>23.32</b>   | 7.14 | 1.80  |
| MBT-NHCH <sub>3</sub> | 4.55                  | <b>28.77</b>   | 7.97 | 15.24 | 7.88                  | <b>22.87</b>   | 7.36 | 2.00  |
| MBT-Cl                | 11.32                 | <b>42.56</b>   | 8.41 | 4.00  | 7.32                  | <b>22.28</b>   | 5.33 | 2.13  |
| MBT-COOH              | 14.60                 | <b>44.27</b>   | 7.38 | 2.51  | 5.40                  | <b>13.20</b>   | 2.55 | 21.68 |
| MBT-NO <sub>2</sub>   | 15.29                 | <b>45.05</b>   | 7.42 | 2.32  | 1.61                  | <b>4.76</b>    | 1.54 | 55.80 |

**Table S3.** Fukui indices for electrophilic attack ( $f^-$ ) of MBT derivatives.

| Compound              | S1      | S <sub>m</sub> | N3      | X in R* | H8      | C4      | C5      | C6      | C7      |
|-----------------------|---------|----------------|---------|---------|---------|---------|---------|---------|---------|
| MBT-H                 | -0.1483 | <b>-0.3482</b> | -0.0517 | -0.0361 | -0.0300 | -0.0366 | -0.0607 | -0.0679 | -0.0328 |
| MBT-CH <sub>3</sub>   | -0.1353 | <b>-0.3337</b> | -0.0525 | -0.0199 | -0.0293 | -0.0362 | -0.0596 | -0.0565 | -0.0266 |
| MBT-OH                | -0.1209 | <b>-0.3200</b> | -0.0531 | -0.0655 | -0.0295 | -0.0412 | -0.0637 | -0.0558 | -0.0304 |
| MBT-SH                | -0.1072 | <b>-0.2855</b> | -0.0474 | -0.1722 | -0.0270 | -0.0375 | -0.0532 | -0.0423 | -0.0241 |
| MBT-NH <sub>2</sub>   | -0.1049 | <b>-0.2881</b> | -0.0486 | -0.0832 | -0.0279 | -0.0396 | -0.0643 | -0.0503 | -0.0303 |
| MBT-OCH <sub>3</sub>  | -0.1171 | <b>-0.3059</b> | -0.0494 | -0.0565 | -0.0286 | -0.0361 | -0.0633 | -0.0516 | -0.0270 |
| MBT-NHCH <sub>3</sub> | -0.0953 | <b>-0.2652</b> | -0.0441 | -0.0812 | -0.0265 | -0.0369 | -0.0617 | -0.0414 | -0.0308 |
| MBT-Cl                | -0.1308 | <b>-0.3256</b> | -0.0519 | -0.1170 | -0.0290 | -0.0372 | -0.0559 | -0.0499 | -0.0258 |
| MBT-COOH              | -0.1475 | <b>-0.3366</b> | -0.0492 | -0.0162 | -0.0286 | -0.0341 | -0.0498 | -0.0549 | -0.0275 |
| MBT-NO <sub>2</sub>   | -0.1523 | <b>-0.3400</b> | -0.0482 | -0.0067 | -0.0300 | -0.0350 | -0.0490 | -0.0514 | -0.0298 |

\*Atom X in functional group R that bonded to C6.

**Table S4.** Fukui indices for nucleophilic attack ( $f^+$ ) of MBT derivatives.

| Compound              | S1      | S <sub>m</sub> | N3      | X in R* | H8      | C4      | C5      | C6      | C7      |
|-----------------------|---------|----------------|---------|---------|---------|---------|---------|---------|---------|
| MBT-H                 | -0.1186 | <b>-0.2676</b> | -0.0304 | -0.0410 | -0.0281 | -0.0747 | -0.0485 | -0.0691 | -0.0685 |
| MBT-CH <sub>3</sub>   | -0.1125 | <b>-0.2587</b> | -0.0303 | -0.0199 | -0.0273 | -0.0751 | -0.0451 | -0.0530 | -0.0654 |
| MBT-OH                | -0.1062 | <b>-0.2523</b> | -0.0313 | -0.0382 | -0.0272 | -0.0890 | -0.0619 | -0.0469 | -0.0701 |
| MBT-SH                | -0.1053 | <b>-0.2503</b> | -0.0274 | -0.0922 | -0.0259 | -0.0797 | -0.0431 | -0.0481 | -0.0671 |
| MBT-NH <sub>2</sub>   | -0.1062 | <b>-0.2511</b> | -0.0327 | -0.0335 | -0.0274 | -0.0848 | -0.0582 | -0.0457 | -0.0632 |
| MBT-OCH <sub>3</sub>  | -0.1086 | <b>-0.2544</b> | -0.0333 | -0.0258 | -0.0278 | -0.0828 | -0.0601 | -0.0463 | -0.0607 |
| MBT-NHCH <sub>3</sub> | -0.1064 | <b>-0.2505</b> | -0.0341 | -0.0238 | -0.0276 | -0.0825 | -0.0595 | -0.0416 | -0.0565 |
| MBT-Cl                | -0.1069 | <b>-0.2533</b> | -0.0269 | -0.0941 | -0.0260 | -0.0807 | -0.0451 | -0.0514 | -0.0714 |
| MBT-COOH              | -0.0986 | <b>-0.2097</b> | -0.0172 | -0.0680 | -0.0223 | -0.0502 | -0.0381 | -0.0547 | -0.0621 |
| MBT-NO <sub>2</sub>   | -0.0728 | <b>-0.1634</b> | -0.0152 | -0.0929 | -0.0184 | -0.0418 | -0.0359 | -0.0296 | -0.0504 |

\*Atom X in functional group R that bonded to C6.

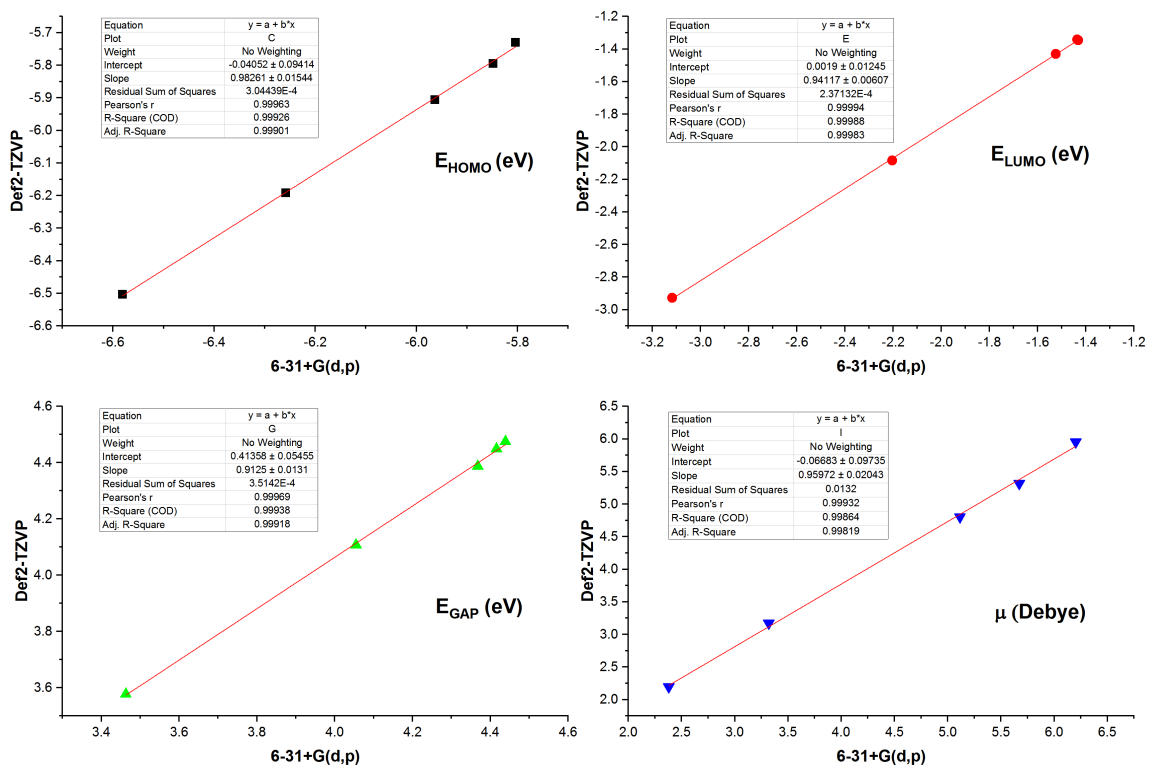

**Fig. S1.** Correlation between quantum chemical parameters of MBT derivatives calculated using 6-31+G(d,p) and Def2-TZVP basis sets, respectively.

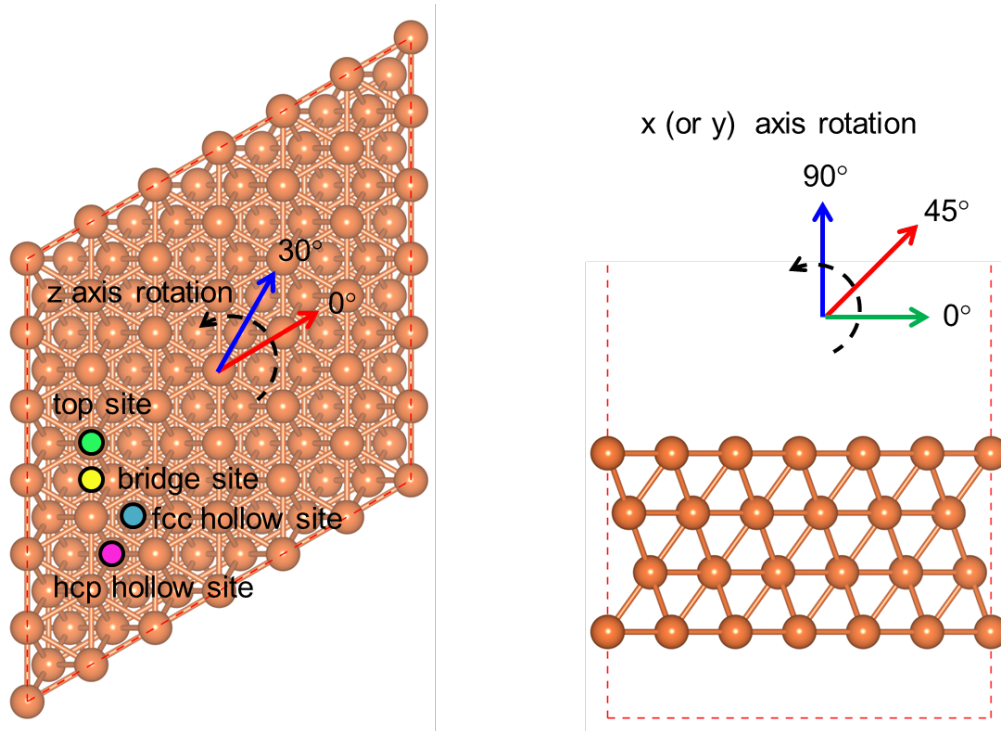

**Fig. S2.** The diagram illustrates high-symmetry adsorption sites and orientations.

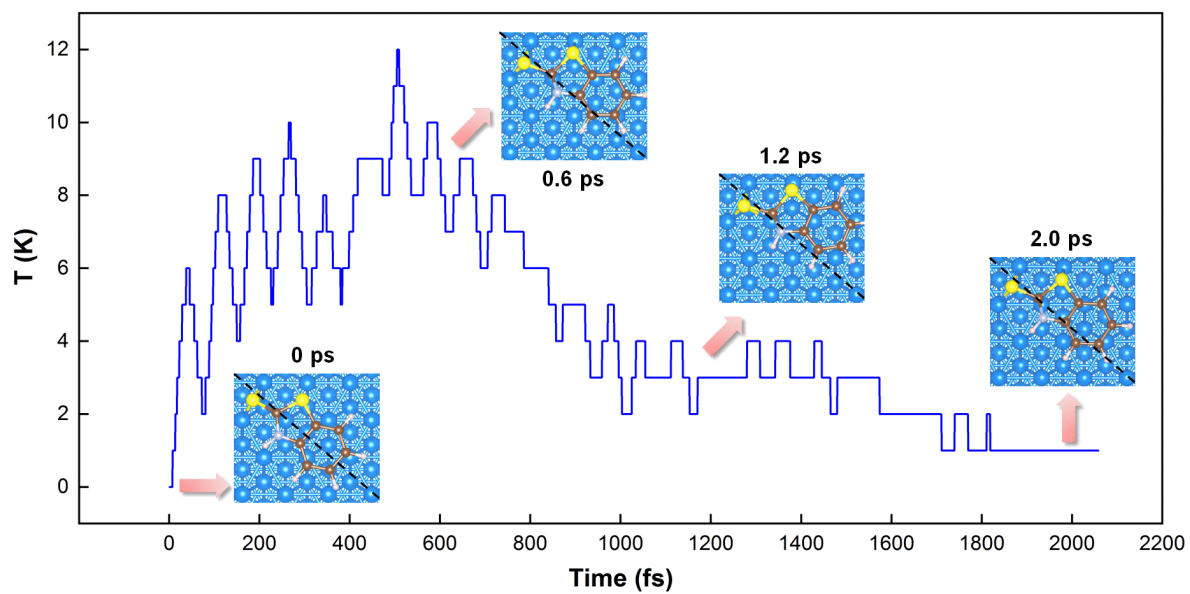

**Fig. S3.** The ab initio molecular dynamics simulation in NVT ensemble for MBT on Cu (111) surface around 0 K.



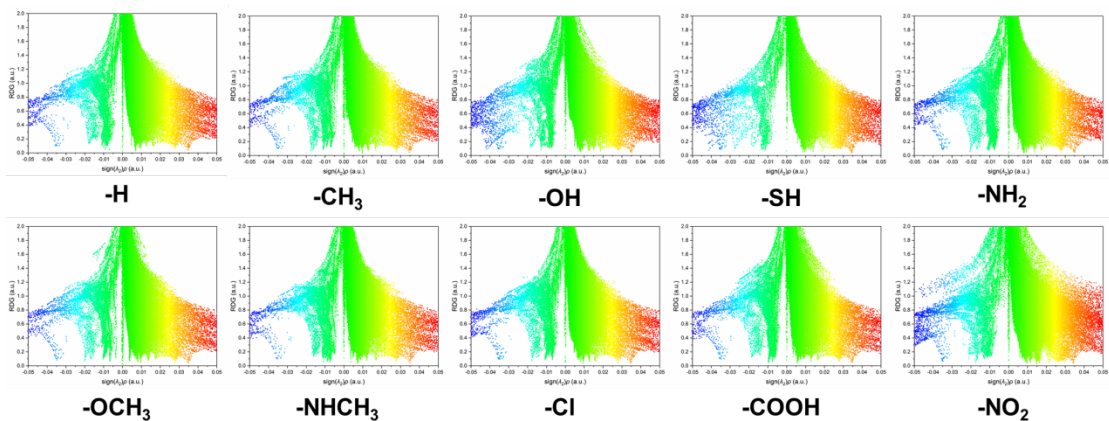

**Fig. S4.** RDG scatter plots for MBTs adsorbed on Cu (111) in a flat configuration. The coloration of the dots follows a blue-green-red scale corresponding to the values of  $\text{sign}(\lambda_2)\rho$ , ranging from -0.05 to 0.05 a.u.

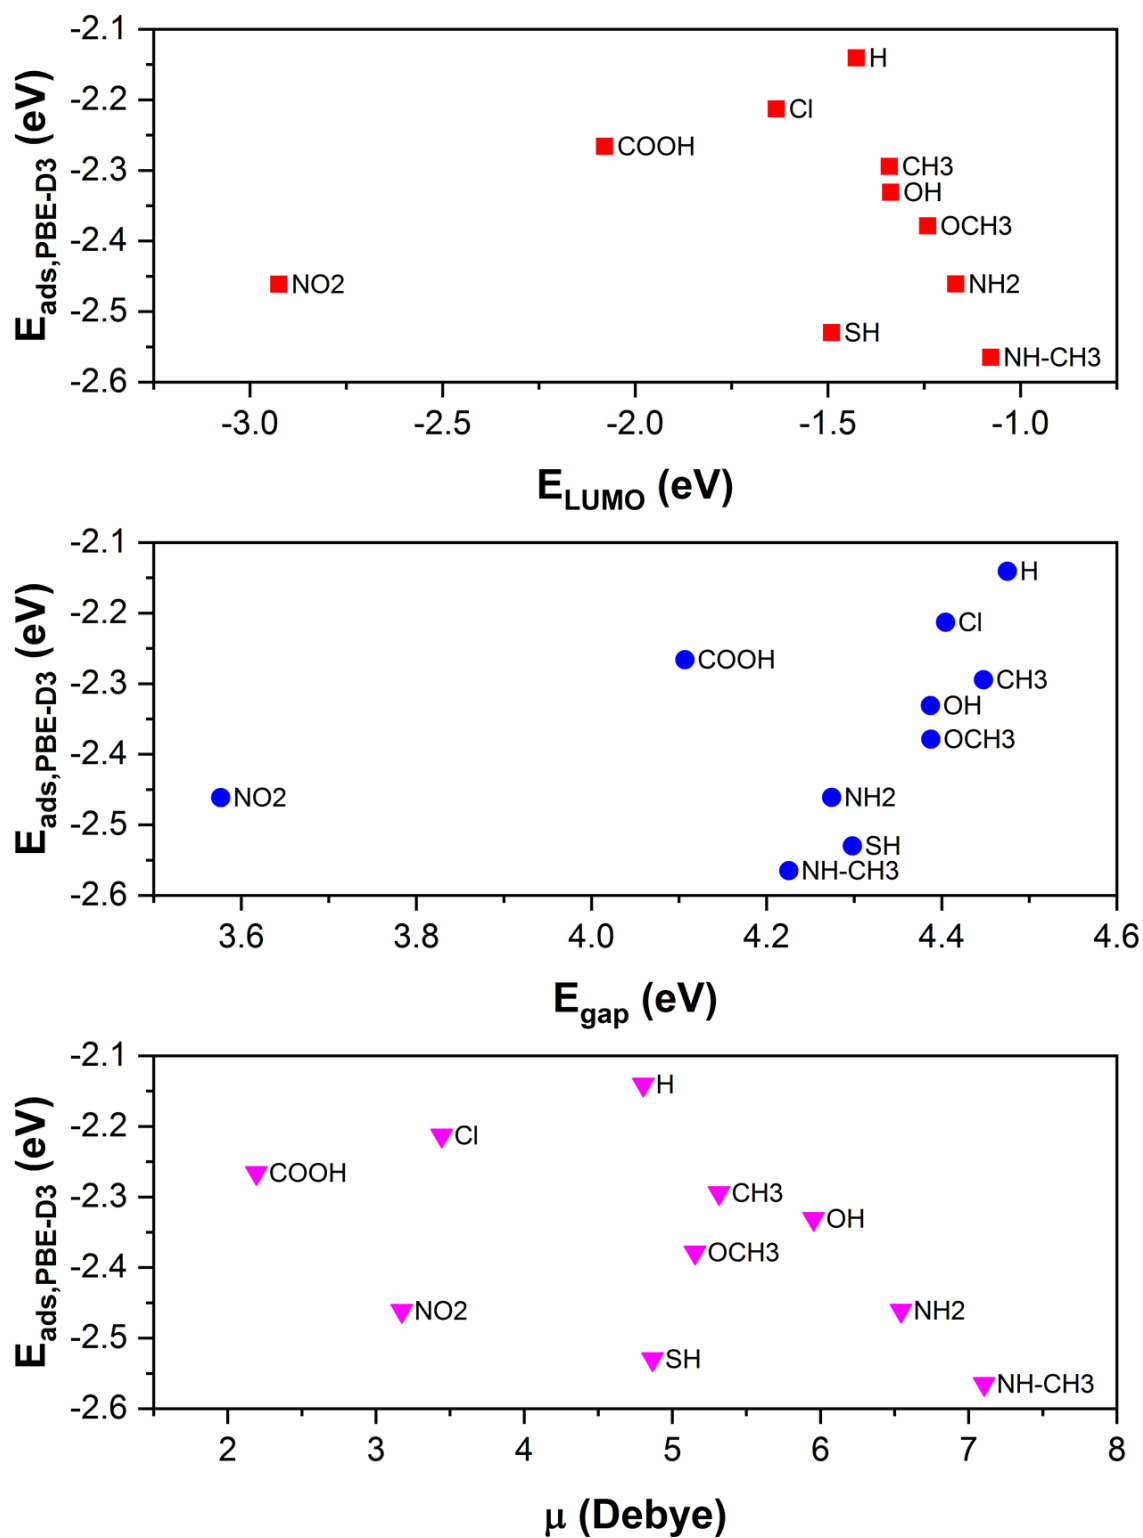

Fig. S5. Correlation between quantum chemical parameters and adsorption energies of MBT derivatives on Cu (111) in flat configuration.

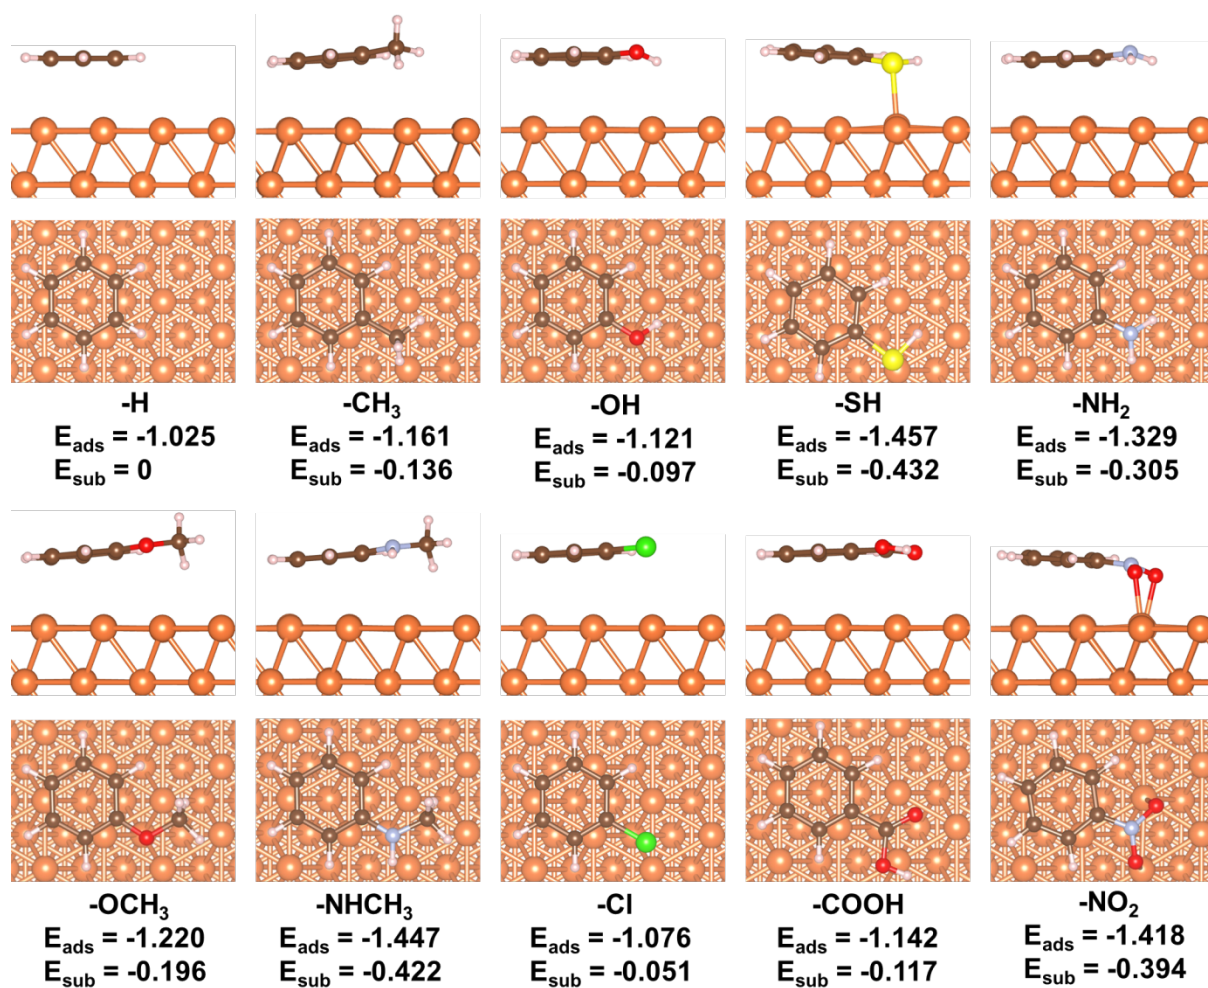

**Fig. S6.** Optimized structures and adsorption energies ( $E_{\text{ads}}$ , eV) of benzene derivatives adsorbed on Cu (111) in flat configuration and the corresponding substitution interaction energies ( $E_{\text{sub}}$ , eV).
